# Supplementary material for: Anti-BCMA/CD19 CAR T Cells with Early Immunomodulatory Maintenance for Multiple Myeloma Responding to Initial or Later-Line Therapy
Source: Oxford University Press journal article supplement (doi:10.1158/2643-3230.bcd-22-0074), 2022-11-21
Supplement: bcd-22-0074_supplementary_tables_and_figures_suppst1-st8_sf1-sf12.docx [file bcd-22-0074_supplementary_tables_and_figures_suppst1-st8_sf1-sf12.docx]

**Supplementary Table 1: Subject characteristics**

|  | **Total (N=30)** | **Phase A (N=10)** | **Phase B** | | | |
| --- | --- | --- | --- | --- | --- | --- |
|  | **Overall (N=20)** | **CART-BCMA (N=10)** | **CART-BCMA + huCART19 (N=10)** | |
| **Sex** |  |  |  |  | |  |
| Female | 11 (36.7%) | 4 (40.0%) | 7 (35.0%) | 5 (50.0%) | | 2 (20.0%) |
| Male | 19 (63.3%) | 6 (60.0%) | 13 (65.0%) | 5 (50.0%) | | 8 (80.0%) |
| **Age** |  |  |  |  | |  |
| Median [Min, Max] | 59  [28, 76] | 55  [33, 76] | 59  [28, 72] | 56  [36, 72] | | 60  [28, 67] |
| **Race** |  |  |  |  | |  |
| Black | 6 (20%) | 1 (10%) | 5 (25%) | 2 (20%) | | 3 (30%) |
| Asian | 2 (7%) | 2 (20%) | 0 (0%) | 0 (0%) | | 0 (0%) |
| Caucasian | 22 (73%) | 7 (70%) | 15 (75%) | 8 (80%) | | 7 (70%) |
| **Revised ISS stage at diagnosis** |  |  |  |  | |  |
| 1 | 1 (3%) | 1 (10%) | 0 (0%) | 0 (0%) | | 0 (0%) |
| 2 | 10 (33%) | 4 (40%) | 6 (30%) | 3 (30%) | | 3 (30%) |
| 3 | 12 (40%) | 2 (20 %) | 10 (50%) | 5 (50%) | | 5 (50%) |
| Missing | 7 (23%) | 3 (30 %) | 4 (20%) | 2 (20%) | | 2 (20%) |
| **High-risk cytogenetics*** |  |  |  |  | |  |
| No | 8 (27%) | 1 (10%) | 7 (35%) | 3 (30%) | | 4 (40%) |
| Yes | 22 (73%) | 9 (90%) | 13 (65%) | 7 (70%) | | 6 (60%) |
| **Prior lines of therapy** |  |  |  |  | |  |
| Median [Min, Max] | 2 [1, 9] | 3.5 [2, 9] | 1 [1, 2] | 1 [1, 2] | | 1 [1, 2] |
| **Time since diagnosis (years)** |  |  |  |  | |  |
| Median [Min, Max] | 0.80  [0.40, 9.7] | 3.2  [1.3, 9.7] | 0.68  [0.40, 1.4] | 0.60  [0.40, 1.4] | | 0.69  [0.42, 1.0] |
| **Bone marrow plasma cell burden at infusion (%)** |  |  |  |  | |  |
| Median [Min, Max] | 5 [0, 91] | 1 [0, 91] | 6 [0, 90] | 5 [1, 90] | | 7.5 [0, 90] |
| **Follow-up (days)** |  |  |  |  | |  |
| Median [95% CI] | 805 [644, 1113] | 1061 [987, NA] | 755 [497, 1092] | 755 [474, NA] | | 805 [497, NA ] |
|  |  |  |  |  | |  |

*Includes the following cytogenetic abnormalities: +1q, t(4;14), t(14;16), t(14;20), del17p, or ≥3 abnormalities on metaphase karyotype

**Supplementary Table S2: Cytogenetic profiles and high-risk features.**

**
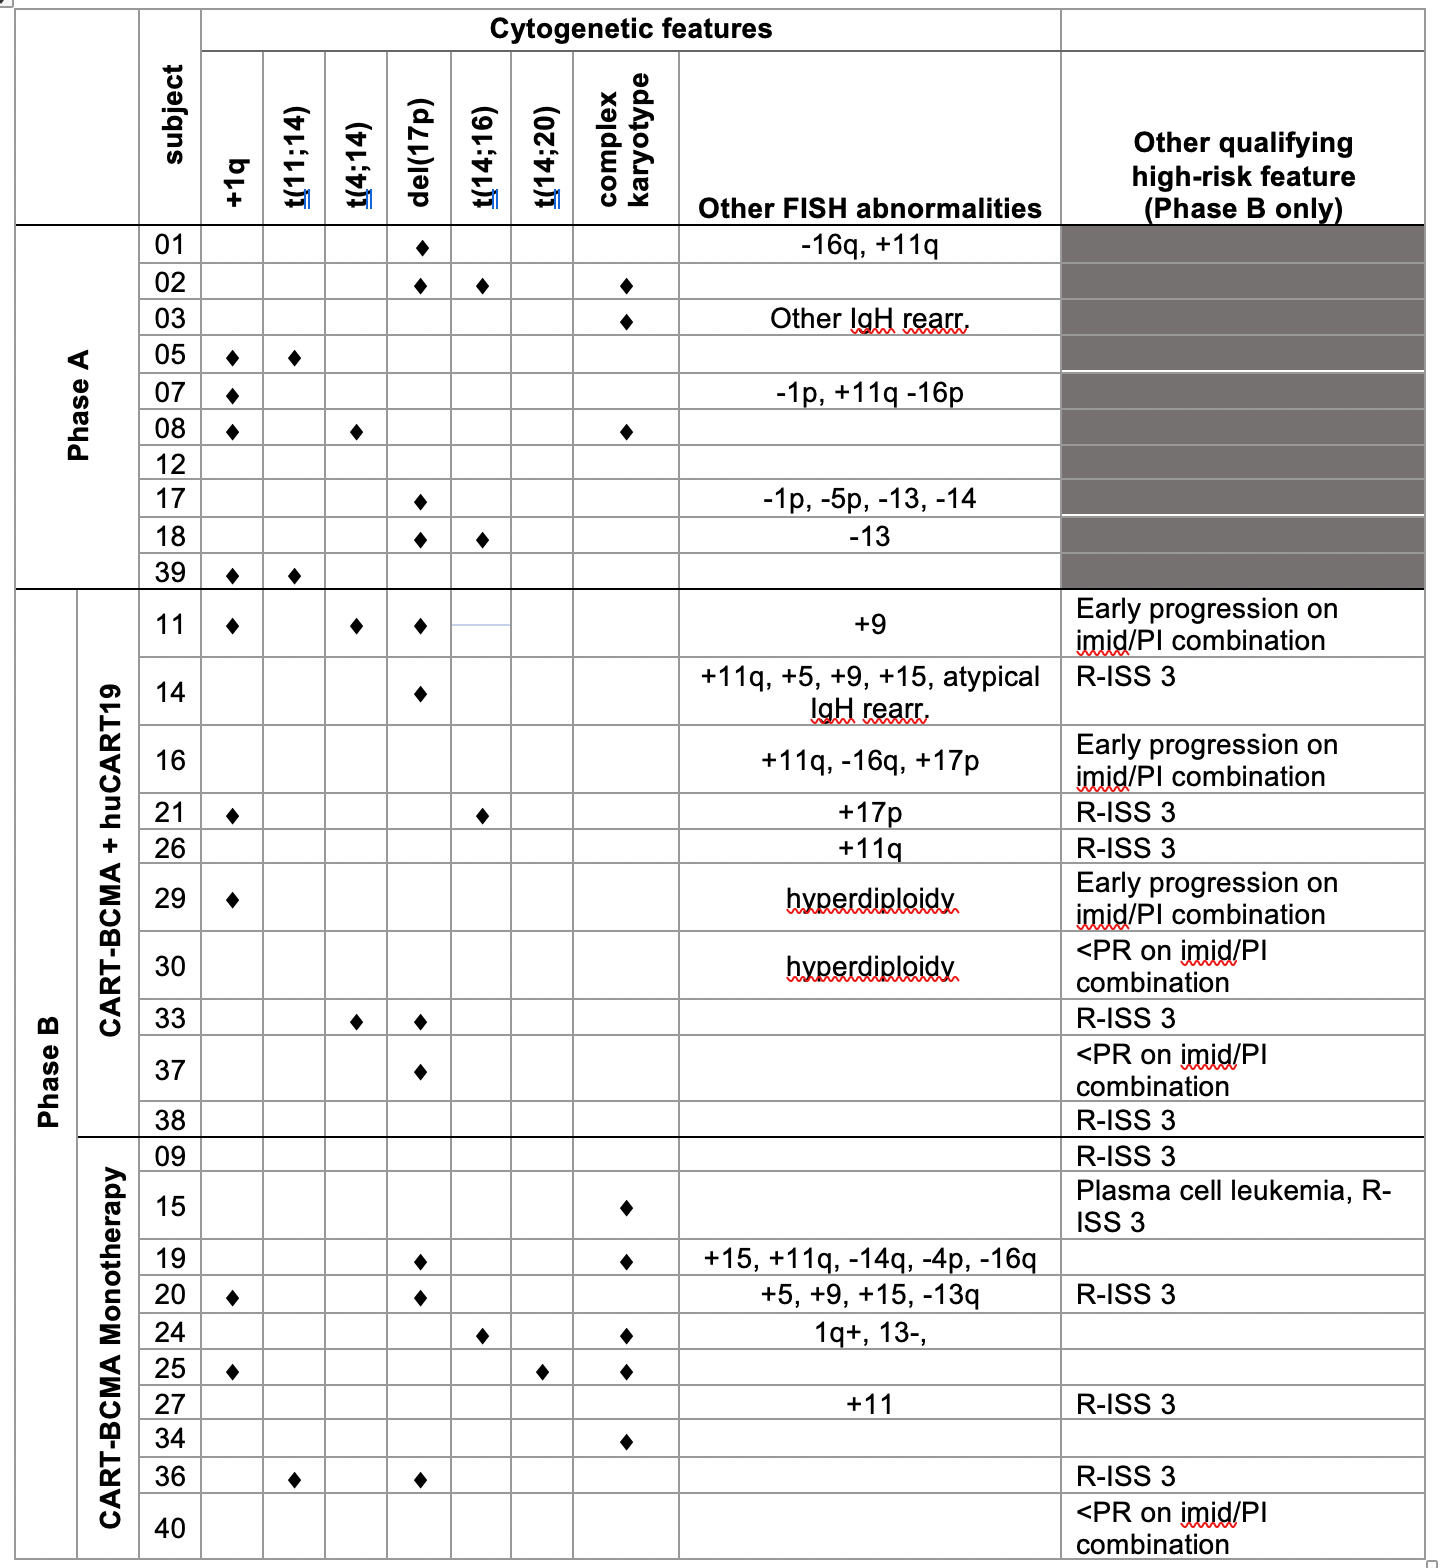
**

**Supplementary Table S3: Prior treatment exposures and refractoriness.**

**Supplementary Table S4: CAR T cell product characteristics.**

**Supplementary Table S5: Products that did not meet target dose.**

| **Subject** | **Phase** | **Dose manufactured**  **(% of target)** | |
| --- | --- | --- | --- |
| **CART-BCMA** | **huCART19** |
| 05 | A | 0.5x108 (10%) | 1.54x108 (30%) |
| 07 | A | 3.27x108 (65%) | Full |
| 17 | A | Full | 2.0x108 (40%) |
| 27 | B/Mono | 4.8x108 (96%) | N/A |

**Supplementary Table S6: Adverse events of grade 3-4**

**Supplementary Table S7: Cytokine release syndrome and ICANS**

**Supplementary Table S8: Maintenance therapy**

**Supplementary Figure S1**

**Supplementary Figure S1: Study schematic and subject disposition.** (A) Diagram of study interventions and patient populations. (B) Disposition of all subjects who signed consent to participate and initiated screening procedures.

**Supplementary Figure S2**

**Supplementary Figure S2: Correlates of manufacturing success.** Comparison of CD4/CD8 ratio in the leukapheresis product used for CAR T cell manufacturing and AUCs through day 28 post-infusion between subjects in whom the full CAR T cell dose was and was not manufactured. Groups were compared using the Wilcoxon rank-sum test.

**Supplementary Figure S3**

**
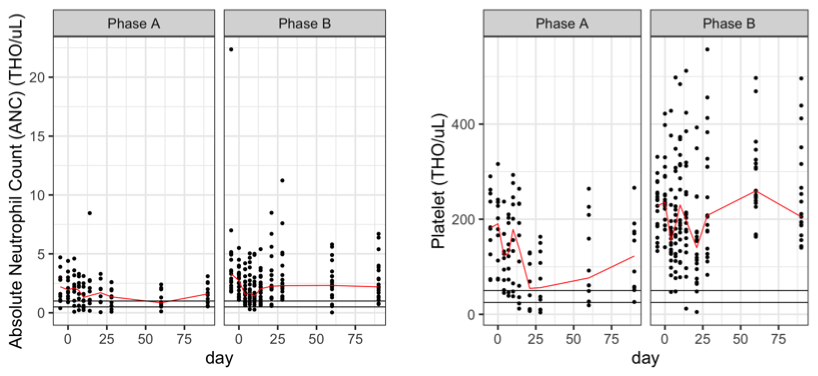
**

**Supplementary Figure S3: Hematopoietic recovery.** Trend in absolute neutrophil and platelet counts pre- and post-infusion. Red line indicates median.

**Supplementary Figure S4**

**Supplementary Figure S4: Post-infusion T cell phenotypes.** (A) Percentage of T cells that were either CD4+ CART-BCMA+ or CD8+ CART-BCMA+ in each subject and (B) percentage of T cells that were CART-BCMA+ (solid line) and CART-BCMA+ HLA-DR+ (dashed line) in each subject by flow cytometry on peripheral blood mononuclear cells.

**Supplementary Figure S5**

**Supplementary Figure S5: Correlates of in vivo expansion and manufacturing success.** (A) Scatter plot of CART-BCMA AUC through day 28 and bone marrow plasma cell burden pre-infusion on bone marrow core biopsy. (B) Comparison of CART-BCMA and huCART19 AUC through day 28 between subjects who received all available CAR T cell doses (“No”) and those in whom the third CAR T cell infusion (60% dose) was not given due to early cytokine release syndrome (“Yes”). Groups were compared using the Wilcoxon rank-sum test.

**Supplementary Figure S6**

**Supplementary Figure S6: Late post-infusion CAR T cell re-expansion.** (A) Flow cytometry detection of CART-BCMA and huCART19 in subject 34 (who only received CART-BCMA) at 2- and 3-months post-infusion showing increase in CART-BCMA frequency at the 3-month timepoint. Analysis is pre-gated on T cells. (B) CART-BCMA AUC through day 28 (left) and peak CART-BCMA levels (right) based on qPCR for vector sequences in subjects who did and did not exhibit increases in CART-BCMA levels between 2- and 3-months post-infusion. Groups are compared using the Wilcoxon rank-sum test.

**Supplementary Figure S7**

**
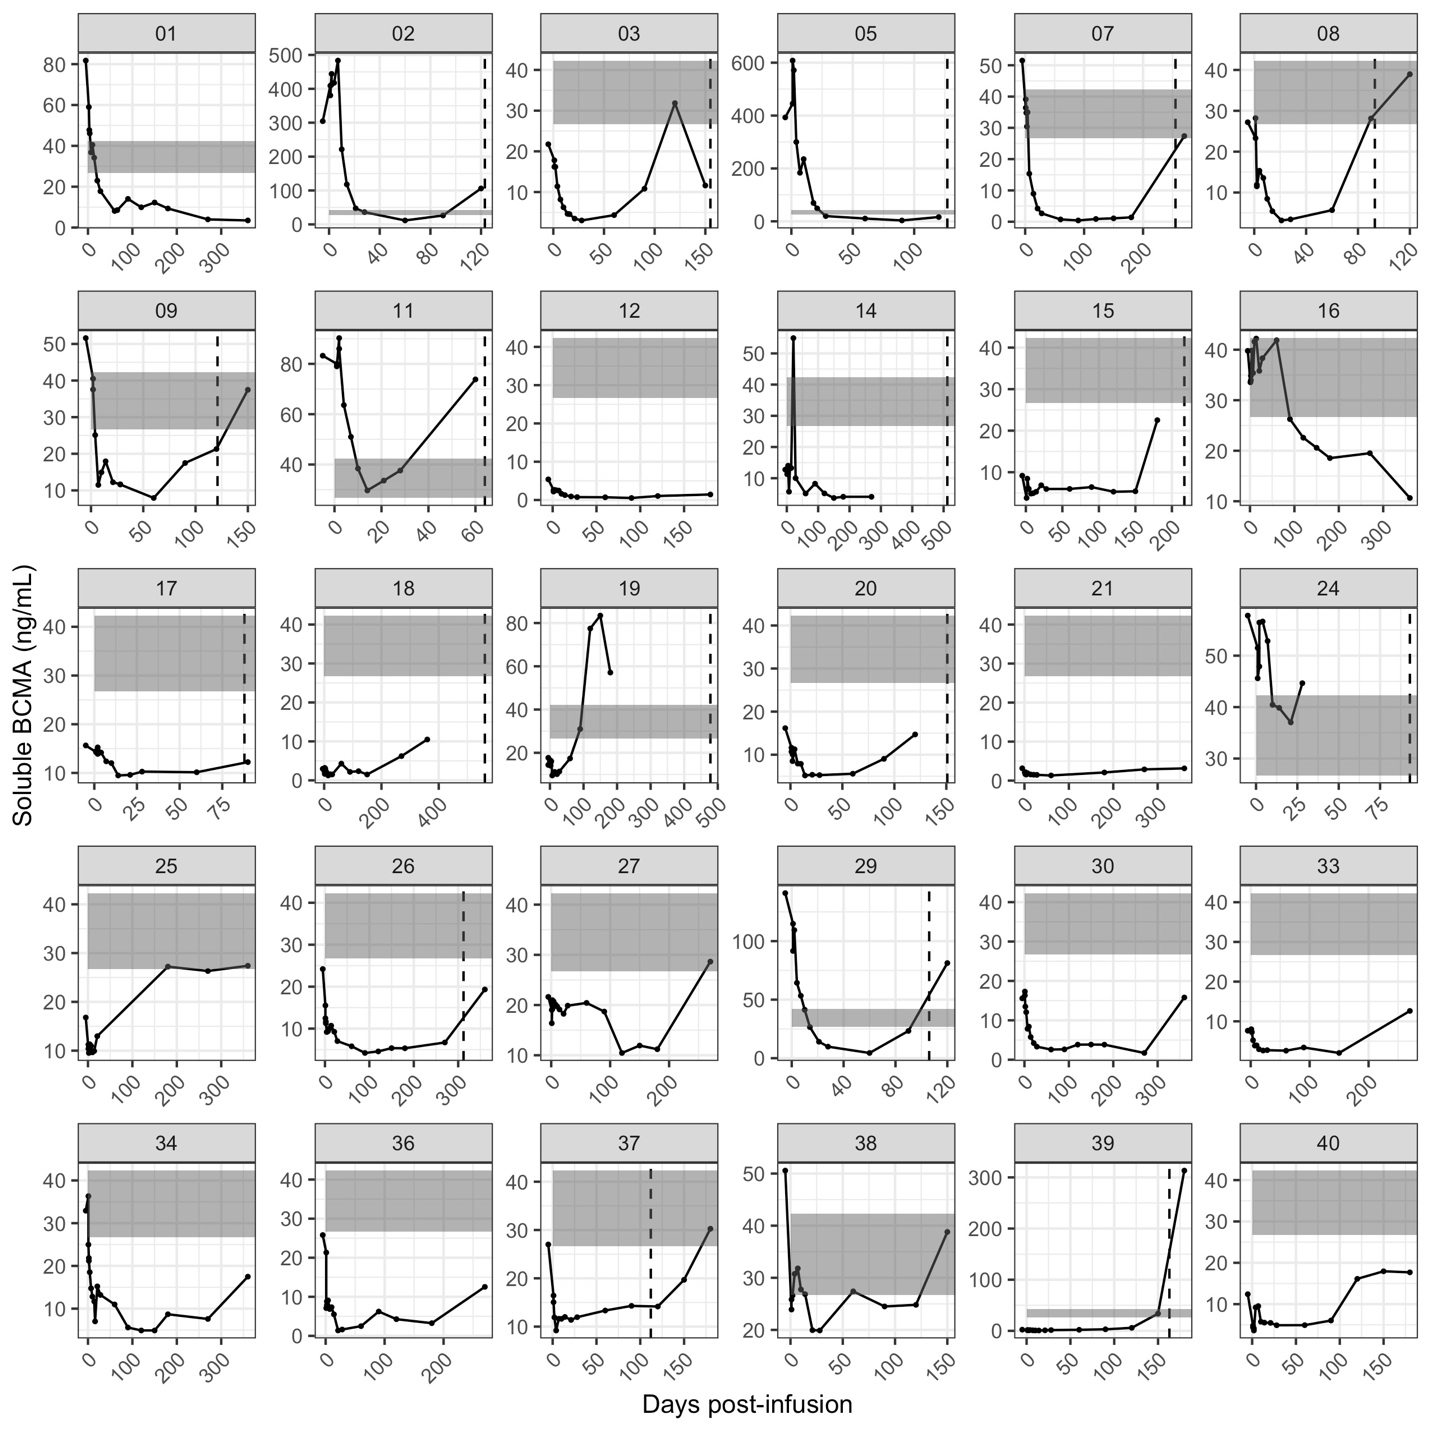
**

**Supplementary Figure S7: Soluble BCMA.** Soluble BCMA levels as measured by ELISA in each subject at pre- and post-infusion timepoints. Shaded box indicates normal range for soluble BCMA in this assay based on mean +/- 2*SEM from a sample of 19 normal donors. Dashed vertical line indicates day of disease progression for subjects who have progressed.

**Supplementary Figure S8**

**Supplementary Figure S8:** Pre-study and on-study disease markers (pink) in additional subjects who exhibited late-onset clinical response after initiating maintenance therapy. Blue lines indicate CART-BCMA levels by qPCR for vector sequences.

**Supplementary Figure S9**

**Supplementary Figure S9:** (A) BCMA MFI on T cells in both the BCMA FMO (left) and full panel (right) from pre-treatment bone marrow aspirates from the prior phase 1 study of CART-BCMA and the current study. (B) Per-subject correlation of BCMA MFI on myeloma cells from the original sequential analysis of freshly acquired aspirates with BCMA antibody-binding capacity (BCMA ABC) obtained from flow cytometry performed in parallel on cryopreserved aspirates from subjects with available cryopreserved specimens. (C) Comparison of BCMA ABC on pre-treatment multiple myeloma cells from the prior phase 1 study and current study, as assessed by parallel flow cytometry on cryopreserved bone marrow aspirates from subjects with available cryopreserved specimens. (D) Correlation of BCMA expression scores as assessed by in situ hybridization and immunohistochemistry on multiple myeloma cells visualized on pre-treatment bone marrow core biopsies.

**Supplementary Figure S10**

**Supplementary Figure S10: Pre- and post-treatment Sox2-specific T cell responses in CART-BCMA monotherapy patients.** Results of interferon-gamma ELISpot assays from PBMCs stimulated with pooled Sox2 peptides vs media control. Horizontal bar depicts mean. The comparison of spot counts between the peptide-stimulated and media controls was made using a one-sided Wilcoxon rank-sum test; a response was considered present if counts in the peptide-stimulated well were higher with a p-value ≤0.05 and is indicated by a red asterisk.

**Supplementary Figure S11**

**Supplementary Figure S11: Pre- and post-treatment Sox2-specific T cell responses in CART-BCMA + huCART19 combination therapy patients.** Results of interferon-gamma ELISpot assays from PBMCs stimulated with pooled Sox2 peptides vs media control. Horizontal bar depicts mean. The comparison of spot counts between the peptide-stimulated and media controls was made using a one-sided Wilcoxon rank-sum test; a response was considered present if counts in the peptide-stimulated well were higher with a p-value ≤0.05 and is indicated by a red asterisk.

**Supplementary Figure S12**

**Supplementary Figure S12: Sustained post-treatment SOX2-specific T-cell responses.** (A) Spot-counts from interferon-gamma ELISpot assays from PBMCs stimulated with pooled SOX2peptides, after subtraction of background (indicated by the media-only control) at baseline (0m) or post-treatment timepoints in four subjects who lacked response at baseline but exhibited response at ≥2 post-treatment timepoints (indicated by red asterisks based on comparisons between peptide-stimulated and media controls as detailed in Figures S8 and S9); timepoints varied between subjects due to availability of adequate PBMCs and missed collections in some patients due to the COVID19 pandemic. (B) Trend in multiple myeloma disease marker (serum M-spike or serum free light chain) normalized to baseline in subjects with (red) or without (blue) sustained post-treatment SOX2-specific T-cell response among Phase B subjects with ongoing progression-free survival.
